# Supplementary material for: Development and validation of the dizziness fear-avoidance behaviours and beliefs inventory for patients with vestibular disorders
Source: PeerJ journal article supplement (doi:10.7717/peerj.15940), 2023-08-29
Supplement: CCMEM.pdf [file CCMEM.pdf]

## Cuestionario de Creencias y Conductas de Miedo y Evitación al Mareo. CCMEM

Por favor, señale la respuesta más apropiada a las conductas y pensamientos asociados a la percepción de mareo o vértigo.

|                                                                                                         | Totalmente<br>desacuerdo | Algo en<br>desacuerdo    | Algo de<br>acuerdo       | Totalmente<br>de<br>acuerdo |
|---------------------------------------------------------------------------------------------------------|--------------------------|--------------------------|--------------------------|-----------------------------|
| 1. Siempre pienso en el movimiento que voy a hacer antes de realizarlo físicamente.                     | <input type="checkbox"/> | <input type="checkbox"/> | <input type="checkbox"/> | <input type="checkbox"/>    |
| 2. Tengo miedo a mover el cuello y la cabeza                                                            | <input type="checkbox"/> | <input type="checkbox"/> | <input type="checkbox"/> | <input type="checkbox"/>    |
| 3. Evito girarme en la cama para que no aparezcan los síntomas                                          | <input type="checkbox"/> | <input type="checkbox"/> | <input type="checkbox"/> | <input type="checkbox"/>    |
| 4. No es seguro que una persona con mi problema camine sola por la calle.                               | <input type="checkbox"/> | <input type="checkbox"/> | <input type="checkbox"/> | <input type="checkbox"/>    |
| 5. Intento caminar con pasos cortos y lentos.                                                           | <input type="checkbox"/> | <input type="checkbox"/> | <input type="checkbox"/> | <input type="checkbox"/>    |
| 6. Tengo miedo a caerme.                                                                                | <input type="checkbox"/> | <input type="checkbox"/> | <input type="checkbox"/> | <input type="checkbox"/>    |
| 7. Tengo miedo a conducir vehículos.                                                                    | <input type="checkbox"/> | <input type="checkbox"/> | <input type="checkbox"/> | <input type="checkbox"/>    |
| 8. Evito realizar actividad física y deportiva.                                                         | <input type="checkbox"/> | <input type="checkbox"/> | <input type="checkbox"/> | <input type="checkbox"/>    |
| 9. Evito subir alturas como escaleras o balcones por mi problema.                                       | <input type="checkbox"/> | <input type="checkbox"/> | <input type="checkbox"/> | <input type="checkbox"/>    |
| 10. Evito utilizar el ordenador o la tablet.                                                            | <input type="checkbox"/> | <input type="checkbox"/> | <input type="checkbox"/> | <input type="checkbox"/>    |
| 11. Una persona con mi problema no debería realizar ejercicio                                           | <input type="checkbox"/> | <input type="checkbox"/> | <input type="checkbox"/> | <input type="checkbox"/>    |
| 12. Evito realizar algunas actividades domésticas                                                       | <input type="checkbox"/> | <input type="checkbox"/> | <input type="checkbox"/> | <input type="checkbox"/>    |
| 13. Tengo miedo de agacharme                                                                            | <input type="checkbox"/> | <input type="checkbox"/> | <input type="checkbox"/> | <input type="checkbox"/>    |
| 14. Me produce malestar mirar hacia arriba por eso lo evito.                                            | <input type="checkbox"/> | <input type="checkbox"/> | <input type="checkbox"/> | <input type="checkbox"/>    |
| 15. Intento evitar girar la cabeza para mirar a un lado                                                 | <input type="checkbox"/> | <input type="checkbox"/> | <input type="checkbox"/> | <input type="checkbox"/>    |
| 16. El mareo me indica que no debo moverme                                                              | <input type="checkbox"/> | <input type="checkbox"/> | <input type="checkbox"/> | <input type="checkbox"/>    |
| 17. Cuando salgo a caminar intento desplazarme por lugares en donde pueda sujetarme para ir más seguro. | <input type="checkbox"/> | <input type="checkbox"/> | <input type="checkbox"/> | <input type="checkbox"/>    |
