# Supplementary material for: Development and validation of the dizziness fear-avoidance behaviours and beliefs inventory for patients with vestibular disorders
Source: PeerJ journal article supplement (doi:10.7717/peerj.15940), 2023-08-29
Supplement: CodeBook.pdf [file CodeBook.pdf]

## **CodeBook for the data base results:**

### Diagnosis:

1. Acute vestibular syndrome
2. Episodic vestibular syndrome
3. Chronic vestibular syndrome

### Treatment received:

1. Yes
2. No

### Treatment type:

1. Medical
2. Rehabilitation
3. Medical and rehabilitation
4. No treatment

### BMI: Body mass Index

### Gender:

1. men
2. woman

### Education

1. uneducated
2. primary
3. secondary
4. university

### Laboral

1. active
2. not employed
3. sick paid leave
4. retired

### DHI\_Total: Dizziness handicap Inventory

DHI\_Functional Subscale

DHI\_Emotional Subscale

DHI\_Physical Subscale

### HADS\_TOTAL: Hospital Anxiety and Depression Scale.

HADS\_A\_TOTAL: Anxiety subscale

HAD\_D\_TOTAL: Depression subscale

D\_FABBI\_item number: Dizziness Fear-Avoidance Behaviors and Beliefs Inventory.

DHI\_Clasi\_Fun\_Emoc: Result of the addition of the functional and emotional subscales.

CLASI\_DHI: classification based on the addition of the DHI emotional and functional subscales:

1. No disability (0-14 points).
2. Moderate disability (15-24 points)
3. Sever disability (>25 points)

D\_FABBI\_TOTAL: Addition of all the items of the Dizziness Fear-Avoidance Behaviors and Beliefs Inventory

D\_FABBI\_Mov: Movement Fear-avoidance subscale results of the Dizziness Fear-Avoidance Behaviors and Beliefs Inventory

D\_FABBI\_ADL: Activities of daily living fear-avoidance subscale results of the Dizziness Fear-Avoidance Behaviors and Beliefs Inventory.
