# Supplementary material for: Development and validation of the dizziness fear-avoidance behaviours and beliefs inventory for patients with vestibular disorders
Source: PeerJ. 2023 Aug 29;11:e15940. doi: 10.7717/peerj.15940 (PMC10473040; doi:10.7717/peerj.15940)
Supplement: Supplemental Information 1 [file peerj-11-15940-s001.xlsx]

## Sheet: Data_Base
Diagnosis	Treatment	Treatment Type	Age	Weigth	Height	BMI	Gender	Education 1uned 2primary 3s secondary 4university	Employment 1activo2notrab3baja4jub	DHIFUNCTIONAL	DHIEMOTIONAL	DHIPHYSICAL	DHITOTAL	HADS_A_TOTAL	HADS_D_TOTAL	HADS_TOTAL	D_FABBI_1	D_FABBI_2	D_FABBI_3	D_FABBI_4	D_FABBI_5	D_FABBI_6	D_FABBI_7	D_FABBI_8	D_FABBI_9	D_FABBI_10	D_FABBI_11	D_FABBI_12	D_FABBI_13	D_FABBI_14	D_FABBI_15	D_FABBI_16	D_FABBI_17	D_FABBI_18	D_FABBI_19	DHI_Clasi_Fun_Emo	CLASI_DHI	D_FABBI_TOTAL	D_FABBI_mov	D_FABBI_AVD
1	2	4	63	88	1.85	25.7122	1	4	1	2	0	8	10	4	4	8	1	2	2	1	1	1	1	1	1	1	1	1	1	1	2	1	2	2	1	2	1	22	12	10
1	2	4	83	77	1.72	26.0276	1	3	4	6	8	4	18	1	8	9	3	1	1	4	4	1	4	1	1	0	4	0	2	1	4	1	1	0	0	14	1	28	11	17
1	2	4	51	85	1.6	33.2031	2	4	1	14	0	16	30	14	8	22	3	2	3	1	1	1	2	1	1	1	2	1	1	1	2	3	1	3	1	14	1	29	17	12
1	2	4	17	74	1.6	28.9062	2	3		2	6	0	8	5	1	6	4	1	1	1	1	1	1	2	1	1	1	1	1	1	1	1	1	1	1	8	1	20	10	10
1	2	4	72	79	1.74	26.0933	1	4	4	2	0	6	8	4	4	8	2	1	1	3	1	1	1	1	1	1	1	1	1	1	1	1	2	0	1	2	1	18	8	10
1	1	1	84	67			2	3	1	6	4	16	26	3	5	8	1	3	1	4	4	1	3	4	1	4	4	1	4	1	1	1	1	4	4	10	1	39	12	27
1	2	4	71	75	1.6	29.2969	1	4	4	4	0	8	12	3	5	8	3	3	1	3	1	1	3	3	1	2	2	1	1	1	1	2	2	3	1	4	1	29	15	14
1	1	2	58	60	1.68	21.2585	2	4	3	4	6	10	20	5	8	13	3	1	1	1	1	1	1	1	3	1	1	1	1	1	1	1	1	1	3	10	1	23	9	14
1	2	4	41	69	1.73	23.0546	1	4	1	10	4	6	20	3	5	8	1	1	1	3	2	1	1	1	1	2	2	1	2	1	1	1	1	2	2	14	1	23	8	15
1	2	4	39	46	1.54	19.3962	2	4	1	4	4	4	12	2	4	6	3	3	1	1	1	1	1	1	1	1	1	1	1	1	1	1	3	1	1	8	1	23	13	10
1	2	4	44	63	1.55	26.2227	2	4	1	4	2	10	16	8	2	10	1	1	1	1	1	1	3	1	1	1	1	1	1	1	3	3	1	3	1	6	1	25	13	12
1	2	4	51	77	1.82	23.246	1	4	1	0	0	0	0	6	3	9	2	2	2	3	1	1	1	1	1	2	1	1	2	1	2	3	2	2	1	0	1	27	15	12
1	2	4	18	73	1.73	24.3911	1	3	4	0	2	0	2	1	3	4	1	1	1	3	3	1	2	1	0	3	2	1	3	3	1	1	1	2	1	2	1	27	8	19
1	2	4	67	65	1.64	24.1672	1	4	4	4	2	8	14	2	3	5	1	1	1	1	1	1	1	1	1	1	1	1	1	1	1	1	1	4	1	6	1	20	10	10
1	2	4	50	86	1.83	25.6801	1	4	1	2	0	10	12	9	7	16	3	2	2	1	1	2	2	2	1	1	1	1	1	1	2	1	1	2	1	2	1	25	13	12
1	1	2	49	73	1.68	25.8645	1	3	1	2	2	10	14	4	3	7	1	1	3	1	1	1	1	1	1	1	1	1	1	1	1	3	1	0	0	4	1	19	10	9
1	2	4	67	56	1.55	23.3091	2	2	1	2	8	8	18	4	3	7	3	1	3	3	1	1	1	1	1	1	1	1	1	1	1	3	3	1	1	10	1	25	15	10
1	2	4	30	89	1.8	27.4691	2	4	1	8	2	14	24	1	4	5	3	3	1	3	1	1	3	3	1	1	1	1	1	1	3	3	3	3	1	10	1	31	19	12
1	1	3	29	48	1.53	20.5049	2	4	1	2	4	2	8	9	4	13	2	2	1	2	1	1	2	1	1	1	2	1	1	1	2	1	1	1	1	6	1	22	10	12
1	1	3	29	103	1.85	30.095	1	4	1	2	2	0	4	6	3	9	1	1	1	3	1	1	1	2	1	1	1	1	1	1	1	1	1	3	1	4	1	19	9	10
1	2	4	66	72	1.57	29.2101	2	4	4	6	0	2	8	6	8	14	1	1	1	3	1	1	1	1	1	1	1	1	1	1	1	3	3	1	1	6	1	21	11	10
1	2	4	59	94	1.9	26.0388	1	4	1	6	2	16	24	1	6	7	3	1	4	3	1	1	1	1	1	1	1	1	1	1	1	3	2	0	0	8	1	23	14	9
1	2	4	42	100	1.77	31.9193	1	3	1	4	0	20	24	1	4	5	2	1	1	4	1	1	1	1	1	1	2	1	1	1	2	2	1	2	1	4	1	22	11	11
1	2	4	69	71	1.63	26.7229	2	2	1	0	0	0	0	2	4	6	1	1	1		0	0	1	0	0	0	0	0	0	0	0	0	0	0	0	0	1	18	10	8
1	2	4	70	68	1.7	23.5294	1	4	4	4	0		4	2	3	5	3	1	1	3	1	2	2	1	1	2	2	1	1	1	1	2	2	1	1	4	1	25	11	14
1	2	4	58	58	1.62	22.1003	2	4	3	8	0	12	20	3	6	9	4	3	3	4	1	1	3	1	3	1	3	1	1	1	1	3	2	4	3	8	1	38	20	18
1	2	4	65	80	1.7	27.6817	1	4	4	2	4	4	10	3	3	6	1	1	1	2	1	1	1	1	1	1	1	1	1	1	1	1	1	4	1	6	1	20	10	10
1	2	4	53	61	1.71	20.8611	1	4	1	4	0	4	8	4	4	8	3	3	3	3	2	1	1	1	1	1	1	1	1	1	1	1	1	0	0	4	1	22	12	10
1	2	4	69	75	1.65	27.5482	2	3	1	10	2	6	18	6	5	11	3	1	3	3	1	1	1	3	1	1	3	1	1	1	1	2	1	4	1	12	1	27	15	12
1	2	4	67	51	1.58	20.4294	2	2	1	0	4	10	14	5	4	9	1	1	1	1	1	2	1	1	2	2	2	1	1	1	2	2	2	0	0	4	1	22	9	13
1	2	4	67	57	1.6	22.2656	2	4	4		0	14	14	3	1	4	1	3	3	3	1	1	3	1	0	1	1	1	1	3	3	3	3	0	0	14	1	28	16	12
1	2	4	29	52	1.67	18.6453	2	4	2	12	8		20	5	5	10	1	1	1		1	1	1	4	3	1	1	3	1	1	1	3	1	0	1	20	2	22	8	14
1	2	4	53	55	1.6	21.4844	2	4	1	4	2	10	16	12	4	16	3	3	1	3	1	1	1	1	1	1	4	1	1	1	1	3	3	3	1	6	2	30	17	13
1	1	1	54	60	1.67	21.5139	2	4	1	16	4	14	34	9	9	18	4	4	4	4	3	3	2	3	4	4	4	3	4	4	4	4	4	4	4	20	2	63	28	35
1	2	4	28	64	1.68	22.6757	2	4	1	6	12	16	34	4	6	10	2	2	1	2	1	1	2	1	1	2	1	1	2	1	2	2	1	2	1	18	2	25	12	13
1	2	4	70	62	1.57	25.1532	2	3	4	20	4	14	38	1	7	8	3	3	3	4	3	3	3	3	4	4	3	2	3	3	2	2	3	2	4	24	2	50	18	32
1	2	4	49	51	1.63	19.1953	2	4	1	20	8	12	40	3	8	11	1	3	1	4	3	3	3	1	1	3	1	1	3	3	1	1	1	3	1	28	3	33	11	22
1	1	3	84	66	1.6	25.7812	1	3	4	16	0	2	18	2	4	6	1	2	4	4	2	3	4	3	4	4	4	0	1	1	3	4	4	4	4	16	3	49	22	27
1	1	1	72	83	1.65	30.4867	1	2	4	26	22	10	58	9	14	23	3	4	3	4	4	3	4	3	4	4	4	3	3	3	2	3	3	4	4	48	3	58	22	36
1	1	1	80	57	1.5	25.3333	2	3	4	26	16	10	52	4	12	16	4	4	3	4	4	4	4	2	0	4	4	2	2	0	1	1	1	4	4	42	3	46	18	28
1	2	4	50	80	1.83	23.8884	1	3	1	12	16	16	44	13	10	23	3	4		2	3	1	4	2	2	1	1	1	1	1	2	2	3	4	2	28	3	35	18	17
1	1	1	57	54	1.57	21.9076	2	3	2	22	18	28	68	9	9	18	3	4	2	3	4	3	4	3	4	4	3	1	3	2	4	4	4	4	3	40	3	56	25	31
1	2	4	52	57	1.68	20.1956	2	3	1	14	10	10	34	6	5	11	3	3	3	4	4	4	3	4	4	4	4	4	4	4	4	4	4	4	4	24	3	64	25	39
1	1	1	50	61	1.67	21.8724	2	4	1	24	16	16	56	4	5	9	4	3	3	3	4	4	3	3	4	4	4	3	3	2	2	3	3	3	4	40	3	56	21	35
1	1	3	41	58	1.65	21.3039	2	4	3	12	10	6	28	6	7	13	1	3	1	3	1	1	3	3	1	1	3	1	1	1	1	1	3	3	1	22	3	27	13	14
1	1	1	81	52	1.49	23.4224	2	1	1	30	18	16	64	8	11	19	4	4	3	4	4	4	4	1	4	4	4	4	4	4	4	3	4	4	4	48	3	66	26	40
2	2	4	66	73	1.62	27.8159	2	3	4	4	0	8	12	2	0	2	3	2	2	3	1	2	2	1	1	1	2	2	1	1	2	2	2	2	1	4	1	29	15	14
2	1	2	71	88	1.7	30.4498	2	4	4	6	0	12	18	8	8	16	3	1	1	1	4	1	1	1	1	1	1	1	1	3	1	2	2	4	1	6	1	29	14	15
2	2	4	26	77	1.75	25.1429	1	4	1	0	2	2	4	4	3	7	4	1	1	3	1	1	1	1	1	3	1	1	3	1	1	1	1	3	1	2	1	26	12	14
2	1	1	63	95	1.89	26.595	1	4	4	2	2	6	10	2	4	6	3	3	3	3	1	1	3	3	1	4	3	1	4	2	1	3	1	4	1	4	1	39	18	21
2	1	2	74	102	1.8	31.4815	1	2	4	2	0	4	6	7	4	11	3	2	1	4	2	1	1	2	1	2	3	0	1	1	1	1	2	4	1	2	1	27	14	13
2	1	2	66	50	1.57	20.2848	2	3	4	4	2	10	16	4	3	7	1	1	1	1	1	1	1	1	2	2	1	1	1	2	0	2	1	0	0	6	1	18	6	12
2	1	2	60	72	1.71	24.623	2	4	1	2	0	4	6	5	3	8	1	1	1	3	1	1	1	1	1	1	1	1	1	1	1	1	1	2	2	2	1	19	8	11
2	2	4	65		1.66		2	3	1	8	2	16	26	3	5	8	2	3	2	3	2	2	3	2	2	2	2	2	2	2	2	3	3	2	2	10	1	38	17	21
2	1	2	49	70	1.63	26.3465	2	4	1	0	4	8	12	7	4	11	1	1	1	1	1	1	1	1	1	1	1	1	1	1	1	1	1	1	1	4	1	18	7	10
2	2	4	56	80	1.75	26.1224	1	4	1	0	0	4	4	5	4	9	1	1	1	2	1	1	1	1	1	1	1	1	1	1	1	1	1	1	1	0	1	18	7	10
2	1	2	66	76	1.75	24.8163	1	4	4	0	2	4	6	5	3	8	3	2	1	2	1	1	1	1	1	1	1	1	1	1	1	1	1	3	1	2	1	22	12	10
2	1	3	66	77	1.6	30.0781	1	4	4	0	0	6	6	0	3	3	1	1	1	1	1	1	1	1	1	1	1	1	1	1	1	1	1	4	1	0	1	20	10	10
2	1	2	53	65	1.6	25.3906	2	4	2	10	2	8	20	6	3	9	2	3	3	2	1	1	3	2	1	1	1	1	1	2	2	2	2	0	0	12	1	26	14	12
2	2	4	70	61	1.6	23.8281	2	3	4	6	4	14	24	5	5	10	3	4	3	2	1	1	4	3	0	1	2	1	1	2	1	4	3	4	4	10	1	39	22	17
2	1	3	53	54	1.78	17.0433	2	4	1	10	0	18	28	9	6	15	3	1	4	3	1	1	1	1	1	1	2	1	1	1	1	3	1	0	0	10	1	23	13	10
2	1	2					2	4	4	4	0	10	14	2	3	5	1	1	1	3	0	1	3	1	0	0	1	1	1	1	1	3	1	0	0	4	1	16	8	8
2	1	2	72	72	1.6	28.125	2	3	1	0	0	0	0	3	3	6	1	1	1	3	1	1	3	1	1	1	1	1	1	1	1	1	1	1	1	0	1	19	7	12
2	2	4	77	72	1.62	27.4348	2	4	4	2	0			2	3	5	3	3	4	4	1	1	1	1	4	1	1	1	1	1	2	1	3	3	1	2	1	32	19	13
2	1	1	80	62	1.7	21.4533	2	2	4	6	4	12	22	1	1	2	4	4	4	0	0	4	4	0	0	0	4	0	0	0	4	4	4	0	0	10	1	36	24	12
2	1	1	75	70	1.58	28.0404	2	4	4	6	4	10	20	5	3	8	2	2	4	2	1	1	1	2	1	1	3	1	1	1	3	1	3	3	3	10	1	32	18	14
2	1	3	72	75	1.76	24.2123	1	3	4	4	0	10	14	7	5	12	1	1	4	1	2	4	4	2	1	1	1	1	1	3	1	1	1	1	1	4	1	29	10	19
2	1	1	72	57	1.6	22.2656	2	2	2	4	0	16	20	0	8	8	4	4	3	3	2	1	1	2	0	2	4	1	2	1	1	4	3	3	4	4	1	40	22	18
2	1	2	61	55	1.52	23.8054	2	4	1	4	2	10	16	8	4	12	2	1	1	1	1	1	1	1	1	2	1	1	1	2	1	2	2	2	1	6	1	23	11	12
2	1	3	40	75	1.8	23.1481	1	4	1	0	6	0	6	7	3	10	1	1	3	2	2	1	1	1	1	1	1	1	1	1	1	1	1	2	2	6	1	22	10	12
2	1	2	50	73	1.8	22.5309	1	4	1	6	2	12	20	5	3	8	2	2	2	1	1	1	1	1	1	1	1	1	1	1	1	2	1	1	1	8	1	21	11	10
2	1	3	63	49	1.5	21.7778	2	3	1	6	8	4	18	8	3	11	4	1	1	1	1	1	1	1	0	1	3	1	1	1	1	1	1	3	4	14	1	26	12	14
2	2	4	46	53	1.7	18.3391	2	4	1	2	4	6	12	2	5	7	3	3	2	2	2	2	2	3	3	2	2	2	2	2	2	2	2	3	2	6	1	38	17	21
2	1	3	72	77	1.68	27.2817	1	3	4	0	0	0	0	0	4	4	2	1	1	1	1	1	1	1	1	1	1	1	1	1	1	1	1	1	1	12	1	18	8	10
2	2	2	46	120	1.78	37.874	1	3	1	2	6	6	14	4	8	12	2	2	3	3	2	1	1	2	1	1	1	1	1	1	2	2	2	3	2	8	1	28	16	12
2	1	1	69	61.2	1.58	24.5153	2	4	4	2	0	8	10	5	5	10	1	1	1	1	1	1	1	1	1	1	1	1	1	1	1	1	1	4	3	2	1	22	10	12
2	1	2	38	50	1.59	19.7777	2	4	1	2	0	4	6	6	3	9	3	3	3	2	1	2	1	1	1	1	1	1	1	1	1	1	3	1	1	2	1	26	15	11
2	2	4	50	70	1.69	24.5089	2	4	1	4	0	6	10	6	5	11	2	3	3	1	1	1	2	1	1	1	1	1	1	1	1	1	1	0	0	4	1	21	11	10
2	1	1	42	100	1.67	35.8564	2	4	2	2	4	4	10	7	4	11	2	3	2	2	1	1	1	1	3	2	1	1	1	1	0	3	2	4	1	6	1	29	16	13
2	2	4	66	63	1.58	25.2363	2	4	1	6	0	12	18	8	5	13	2	3	3	1	1	1	1	1	1	1	1	1	1	1	1	3	3	2	1	6	1	27	17	10
2	1	1	56	75	1.5	33.3333	2	2	1	12	3	12	27	3	4	7	3	3	4	4	3	3	3	3	3	3	2	1	2	2	4	4	3	4	2	15	2	49	25	24
2	1	1	68	74	1.68	26.2188	1	4	4	20	4	12	36	7	10	17	2	1	1	2	2	1	1	1	1	1	1	1	1	1	1	1	1	4	1	24	2	22	11	11
2	1	3	67	70	1.52	30.2978	2	3	4	10	4	2	16	2	0	2	3	3	2	2	1	3	4	3	4	1	3	4	1	1	1	1	1	1	1	14	2	35	12	23
2	2	4	39	56	1.62	21.3382	2	4	1	14	8	14	36	11	5	16	3	3	4	4	2	2	3	3	1	1	1	1	1	2	3	3	2	3	1	22	2	36	21	15
2	2	4	68		1.6		2	4	4	12	12	14	38	2	0	2	4	3	4	4	1	1	3	1	3	3	2	1	2	1	2	0	0	4	4	24	2	38	17	21
2	2	4	57	54	1.54	22.7694	2	3	1	14	2	14	30	16	7	23	4	4	4	3	1	3	4	4	1	3	3	1	1	1	3	3	3	4	3	16	2	46	25	21
2	1	1	55	79	1.64	29.3724	1	2	1	14	12	8	34	9	11	20	3	2	3	3	2	4	2	2	2	2	2	2	2	2	3	3	3	0	0	26	2	37	17	20
2	1	3	72	72	1.72	24.3375	1	4	4	8	12	10	30	9	4	13	1	3	1	3	3	1	3	1	3	1	1	1	1	1	1	3	2	2	2	20	2	30	13	17
2	1	1	71		1.65		2	3	1	8	8	6	22	7	5	12	1	2	3	4	3	3	3	1	0	1	1	1	1	1	2	1	2	2	2	16	2	29	13	16
2	1	1	29	83	1.68	29.4076	2	4	1	8	12	18	38	12	7	19	1	3	3	4	2	2	3	1	1	2	2	1	1	1	3	2	2	2	1	20	2	32	16	16
2	2	4	45	70	1.7	25.0995	1	4	1	14	6	10	30	6	5	11	3	4	1	3	1	1	4	2	1	1	4	1	1	1	2	4	4	1	1	20	2	35	19	16
2	2	4	22	52	1.58	20.83	2	4	2	14	10	14	38	10	7	17	3	3	4	3	1	1	3	2	3	1	1	1	1	1	1	3	3	3	1	24	2	34	20	14
2	2	4	48	57	1.64	21.1927	2	4	1	4	0	10	14	7	3	10	3	3	3	3	1	1	3	1	4	1	3	1	1	1	1	1	3	4	1	15	2	35	18	17
2	2	4	64	91	1.7	31.4879	1	3	4	8	10	12	30	11	7	18	3	4	3	4	2	1	1	3	1	1	2	1	1	2	2	2	2	4	2	18	2	34	20	14
2	1	3	45	77	1.65	28.2828	2	4	1	20	32	14	66	2	3	5	1	3	3	3	1	1	3	1	1	3	4	1	1	2	2	1	2	4	1	52	2	34	16	18
2	2	4	71	53	1.5	23.5556	2	2	1	18	0	14	32	0	3	3	1	3	3	4	4	1	4	1	1	1	4	0	4	1	3	3	1	4	1	18	2	39	18	21
2	1	2	56	53.5	1.5	23.7778	2	4	4	20	12	16	48	10	7	17	1	2	2	2	2	1	2	1	0	0	1	1	1	1	1	2	1	1	1	32	2	20	10	10
2	1	1	52	67	1.66	24.3141	2	4	1	18	8	8	34	7	6	13	3	3	4	4	2	1	2	1	2	2	3	1	1	2	2	1	1	3	1	24	2	34	17	17
2	1	1	87	54			2	1	4		22	20	42	11	14	25	1	2	2	4	4	3	2	1	4	2	3	4	1	3	3	1	1	1	1	16	2	38	11	27
2	2	4	64	72.5	1.47	33.5508	2	4	4	12	8	22	42	11	10	21	1	3	3	4	1	1	3	3	1	3	3	1	1	1	1	3	1	0	0	20	2	27	12	15
2	2	4	56	63	1.75	20.5714	2	4	1	8	12	6	26	6	3	9	1	1	4	1	1	1	1	1	1	1	1	1	1	1	3	3	1	3	1	20	2	26	16	10
2	2	4	46	60	1.55	24.974	2	4	1	8	12	10	30	6	7	13	1	1	1	3	1	1	1	3	2	1	1	1	1	1	1	1	1	2	3	20	2	21	8	13
2	1	1	60	72	1.7	24.9135	2	4	1	14	4	12	30	4	4	8	2	2	2	2	1	1	1	1	1	1	1	1	1	1	2	1	1	2	1	18	2	22	12	10
2	1	1	59	76	1.59	30.0621	2	3	4	15	10	12	37	10	9	19	4	4	4	3	1	3	4	4	4	3	4	3	3	3	4	4	4	0	0	25	3	52	24	28
2	1	1	64	58	1.57	23.5304	2	4	4	12	14	12	38	7	6	13	3	4	4	4	3	3	4	2	2	3	3	2	2	2	3	4	3	4	3	26	3	52	25	27
2	1	1	62	65	1.6	25.3906	2	3	1	16	16	24	56	9	7	16	3	4	4	4	2	3	4	3	3	4	4	1	3	3	1	4	4	3	4	32	3	54	23	31
2	2	4	72	50	1.5	22.2222	2	3	4	24	26	20	70	11	10	21	2	2	2	3	1	2	2	2	2	2	2	1	2	2	2	2	2	2	2	50	3	32	14	18
2	2	2	55	80	1.74	26.4236	2	4	1	26	12	18	56	12	9	21	3	3	4	4	2	2	2	1	1	2	4	3	2	1	4	4	4	4	4	38	3	49	26	23
2	1	1	25	57	1.7	19.7232	2	4	1	16	22	12	50	10	11	21	4	3	2	4	2	1	3	1	3	3	1	2	1	1	1	2	3	4	1	38	3	37	19	18
2	1	3	58	45	1.58	18.026	2	4	4	24	18	26	68	11	7	18	4	3	3	4	2	3	4	3	4	3	3	2	1	2	2	2	2	2	2	42	3	44	18	26
2	1	1	26	63	1.67	22.5896	2	4	1	22	14	24	60	11	11	22	4	3	4	4	3	1	3	1	3	4	3	1	4	4	4	4	1	4	3	36	3	53	24	29
2	1	1	53	55	1.64	20.4491	2	4	1	22	22	24	68	14	10	24	4	4	4	4	4	4	4	4	4	4	3	4	4	4	4	4	3	4	4	44	3	66	27	39
2	1	1	55	70	1.64	26.0262	2	4	1	24	16	18	58	3	3	6	4	4	4	3	2	3	4	3	2	3	1	3	1	1	3	4	4	4	4	40	3	51	27	24
2	2	4	59	83	1.7	28.7197	1	4	1	6	6	8	20	8	10	18	3	3	1	3	3	1	3	2	3	2	2	1	2	2	2	3	3	3	3	12	3	40	18	22
2	1	1	62	64	1.63	24.0882	2	4	3	32	22	20	74	9	10	19	4	4	4	4	4	4	4	4	4	4	4	3	4	3	4	4	4	4	4	54	3	66	28	38
2	1	3	59	53	1.53	22.6409	2	4	3	26	12	24	62	8	9	17	4	4	4	4	2	3	4	3	3	3	3	3	3	3	4	4	4	4	3	38	3	58	28	30
2	1	3	66	80	1.78	25.2493	1	3	4	24	22	16	62	9	9	18	4	4	4	4	3	3	3	2	2	1	2	2	1	2	3	3	3	0	0	46	3	40	21	19
2	2	4	43	64	1.68	22.6757	2	4	1	12	14	16	42	11	5	16	3	4	3	3	1	1	3	2	2	3	3	2	2	1	3	4	3	3	1	26	3	42	23	19
2	1	1	78	64			2	4	4	8	4	4	16	4	0	4	3	1	1	3	4	3	4	4	4	3	3	4	4	3	4	3	3	0	0	15	3	47	15	32
2	2	4	37	51	1.64	18.9619	2	4	1	18	8	20	46	14	5	19	3	3	1	3	2	1	3	3	3	1	2	1	1	3	3	3	3	3	2	26	3	38	19	19
2	1	1	57	85	1.83	25.3815	1	3	1	2	4	10	16	3	6	9	4	4	3	3	1	1	1	1	1	1	1	1	1	1	3	3	3	4	1	26	3	34	24	10
2	2	4	61	73	1.85	21.3294	1	4	1	12	14	18	44	6	7	13	4	4	1	4	3	3	4	2	1	2	2	1	2	1	1	4	4	4	4	26	3	45	22	23
2	2	4	76	53	1.6	20.7031	2	2	1	14	6	20	40	10	9	19	3	4	4	4	4	4	4	3	4	4	4	4	1	1	4	4	4	4	4	35	3	61	27	34
2	2	4	67	52	1.53	22.2137	2	4	4	12	10	10	32	6	5	11	3	3	4	4	4	3	3	3	3	2	4	1	3	3	3	3	3	4	3	26	3	52	23	29
2	1	1	72	60	1.6	23.4375	2	2	1	16	16	22	54	6	7	13	3	1	4	4	4	4	4	4	0	4	4	0	4	4	4	4	4	4	4	32	3	56	24	32
2	1	1	44	82	1.8	25.3086	1	4	3	28	18	22	68	10	7	17	4	4	4	4	2	3	3	3	3	3	3	3	3	3	4	4	4	3	3	46	3	56	27	29
2	1	1	59	76	1.63	28.6048	2	4	3	10	8	6	18	6	6	12	3	4	4	0	3	1	3	1	0	4	4	4	3	1	4	2	3	4	4	24	3	51	24	27
2	1	3	32	62	1.63	23.3355	2	4		18	18	16	52	7	5	12	3	3	2	3	2	4	4	4	4	3	2	1	1	1	2	2	3	0	0	36	3	37	15	22
3	1	1	78	86	1.76	27.7634	1	4	4	0	8	8	16	6	7	13	2	2	1	4	1	1	3	2	1	1	1	1	1	1	2	4	3	3	2	8	1	30	17	13
3	2	4	68	64	1.61	24.6904	2	4	4	6	4	14	24	6	4	10	2	3	3	3	1	3	3	3	0	2	4	1	2	2	3	3	3	1	2	10	1	38	18	20
3	2	4	46	80	1.8	24.6914	1	4	1	0	2	2	4	4	6	10	1	1	1	1	1	1	1	1	1	1	1	1	1	1	1	1	1	1	1	2	1	18	8	10
3	1	2	56	82	1.8	25.3086	1	4	1	8	4	6	18	12	8	20	1	1	1	1	1	1	1	1	1	1	1	1	1	1	1	2	1	1	1	12	1	18	8	10
3	2	4	61	66	1.66	23.9512	2	4	1	6	4	6	16	16	14	30	1	4	4	4	3	2	4	1	1	1	1	1	1	1	2	1	2	4	1	10	1	34	18	16
3	2	4	55	53	1.5	23.5556	2	4	1	0	0	0	0	13	10	23	2	1	1	1	1	1	1	1	1	1	1	1	1	1	1	1	1	1	1	0	1	18	8	10
3		1	18	50	1.57	20.2848	2	4	2	4	4	6	14	7	5	12	3	1	3	3	2	1	3	2	0	3	1	1	2	1	1	1	2	4	1	8	1	30	15	15
3	1	1	77	55	1.6	21.4844	2	4	4	4	2	12	18	10	7	17	1	1	1	3	1	1	3	1	1	1	1	2	1	1	2	3	2	2	1	6	1	25	12	13
3	2	4	85	48	1.5	21.3333	1	2	4	10	4	8	22	7	7	14	3	3	1	4	3	3	3	1	3	1	1	0	1	1	1	1	3	0	0	14	1	28	12	16
3	1	1	79	85.7	1.73	28.6344	1	2	4	4	2	6	12	0	10	10	4	3	1	4	1	2	1	4	1	1	1	1	1	1	1	1	3	3	1	6	1	27	16	11
3	2	4	63	52	1.64	19.3337	2	4	1	10	6	4	20	3	3	6	3	4	1	2	1	1	4	3	3	1	3	1	1	1	3	3	4	4	2	16	2	40	22	18
3	2	4	59	51	1.6	19.9219	2	4	1	9	6	18	33	3	3	6	1	1	3	4	1	4	1	1	4	4	1	1	1	1	4	4	4	4	4	15	2	43	21	22
3	2	4	65	70	1.62	26.6728	2	4	4	13	2	14	29	3	3	6	4	3	3	4	2	3	3	3	4	2	4	3	2	2	2	3	3	0	0	24	2	43	18	25
3	2	4	45	68	1.69	23.8087	2	4	1	12	2	14	28	6	4	10	3	3	2	3	4	3	4	3	1	1	1	1	1	1	3	3	3	4	3	15	2	41	21	20
3	2	4	68	70	1.6	27.3437	2	4	4	12	6	14	32	10	7	17	3	1	1	4	4	4	1	3	3	4	4	4	3	3	3	4	4	4	4	18	2	54	20	34
3	2	4	60	63	1.58	25.2363	2	4	4	10	2	14	26	5	7	12	1	3	1	4	3	3	3	3	1	1	3	1	1	4	3	4	4	4	1	19	2	41	20	21
3	1	2	57	73	1.77	23.3011	1	3	1	10	8	14	32	6	6	12	3	3	3	2	1	3	3	1	1	1	1	3	1	1	3	3	3	3	1	18	2	37	21	16
3		4						3		10	6	6	22	2	4	6	4	3	1	3	2	2	3	1	1	1	4	1	1	1	3	2	3	2	1	16	2	35	18	17
3	1	2	59	100	1.9	27.7008	1	4	1	8	12	6	26	12	9	21	2	2	1	1	1	1	2	1	2	2	2	1	1	1	1	1	1	1	1	20	2	23	9	14
3	2	4	33	56	1.68	19.8413	2	4	1	12	2	10	24	9	8	17	3	2	2	2	2	2	3	1	1	2	2	1	1	3	2	2	2	4	2	15	2	36	17	19
3	2	4	51	60	1.69	21.0077	2	4	2	14	6	10	30	8	5	13	2	1	1	2	1	1	1	2	1	1	2	1	1	1	1	1	2	3	2	20	2	23	11	12
3	1	1	41	78	1.72	26.3656	1	4	1	10	10	8	28	3	6	9	1	3	1	2	1	1	3	1	1	2	3	2	2	2	2	3	3	3	1	20	2	34	16	18
3	1	1	47	100	1.84	29.5369	1	3	1	16	18	18	52	8	10	18	4	4	4	3	1	1	3	2	1	3	1	1	1	1	1	4	1	1	1	24	2	33	19	14
3	1	1	56	54	1.6	21.0937	2	4	1	12	6	16	34	7	5	12	3	4	3	3	1	2	4	1	2	1	1	1	1	1	3	2	3	2	2	18	2	36	20	16
3	1	1	74	62			2	2	1	10	14	12	36	6	7	13	0	0	4	4	4	2	4	4	4	4	4	4	4	2	1	1	1	0	0	24	2	39	7	32
3	2	4	35	58	1.57	23.5304	2	4	1	12	8	5	25	6	8	14	2	3	2	3	3	3	3	2	2	3	2	1	3	3	2	3	2	3	2	20	2	42	17	25
3	1	3	41	80	1.53	34.1749	2	4	2	10	8	10	28	12	9	21	4	3	4	3	1	1	3	2	1	1	1	1	1	1	3	1	3	0	0	18	2	29	18	11
3	1	2	64	52	1.55	21.6441	2	4	4	12	12	12	36	5	6	11	2	3	1	3	2	2	2	1	0	1	2	1	1	1	1	1	1	4	2	24	2	27	13	14
3	1	1	85	63	1.71	21.5451	1	4	4	10	10	16	36	2	10	12	4	3	1	2	1	3	4	1	3	3	3	1	1	1	2	1	1	1	3	20	2	36	13	23
3	1	3	49	80	1.7	27.6817	1	4	1	20	16	18	54	13	10	23	2	3	1	1	1	1	1	3	1	2	3	0	2	4	4	2	2	4	1	18	2	34	18	16
3	2	4	57	59.8	1.54	25.215	2	4	3	16	12	14	42	4	7	11	1	1	1	3	1	3	4	1	4	2	3	1	2	4	1	1	1	1	4	24	2	35	7	28
3	2	4	49	55	1.68	19.487	2	3	1	12	8	10	30	10	6	16	4	3	2	3	2	3	3	3	3	3	4	1	1	1	2	3	3	3	3	20	2	44	20	24
3	2	4	77	61	1.62	23.2434	2	4	4	14	12	8	34	3	4	7	3	4	4	4	1	3	4	4	0	4	1	4	4	4	4	4	4	4	2	26	3	54	27	27
3	1	1	56	59	1.78	18.6214	1	4	4	16	9	18	43	1	3	4	4	1	1	3	4	1	4	2	4	1	4	1	4	4	3	4	4	3	4	25	3	51	20	31
3	2	4	72	70	1.55	29.1363	2	3	4	14	6	16	36	3	10	13	3	3	3	4	2	4	3	1	0	3	4	2	1	1	4	4	4	4	2	20	3	47	25	22
3	2	4	58	70	1.61	27.0051	2	4	1	16	8	16	40	10	6	16	3	3	4	4	3	4	4	4	0	4	4	4	4	3	4	4	4	4	4	24	3	60	26	34
3	2	4	51	90	1.65	33.0579	2	3	1	8	4	8	20	6	6	12	3	4	4	3	2	2	4	3	2	2	2	2	2	1	2	2	3	3	2	12	3	42	21	21
3	2	4	33	56	1.6	21.875	2	4	1	8	8	4	20	6	3	9	4	3	4	3	4	4	4	3	4	3	4	4	4	4	4	4	4	4	4	16	3	66	27	39
3	2	4	76	65	1.58	26.0375	2	4	4	8	4	14	26	4	2	6	3	4	3	4	3	3	4	2	0	3	4	1	3	3	3	3	2	4	4	15	3	50	22	28
3	1	1	38	76	1.63	28.6048	2	4	1	20	6	14	40	10	9	19	4	3	3	3	3	3	4	2	3	3	4	3	2	3	3	3	3	4	4	26	3	55	23	32
3	2	4	44	71	1.61	27.3909	2	4	1	18	14	12	44	6	3	9	3	3	3	0	4	3	4	3	3	2	3	2	1	1	3	3	2	2	1	32	3	43	19	24
3	2	4	61	70	1.69	24.5089	1	4	1	16	8	16	40	5	9	14	2	4	4	4	2	3	3	2	1	2	4	2	2	1	4	3	3	4	3	26	3	47	24	23
3	2	4	66	70	1.62	26.6728	2	4	4	18	12	16	46	11	7	18	3	4	3	4	1	2	4	4	4	2	4	2	1	1	4	4	4	4	4	30	3	51	26	25
3	2	4	60	73	1.7	25.2595	2	4	4	18	14	12	44	10	9	19	3	4	1	4	3	3	3	1	4	1	4	3	1	3	3	1	4	4	3	32	3	48	20	28
3	1	3	56	60	1.63	22.5827	2	4	3	26	22	12	60	12	9	21	3	1	1	4	4	4	4	2	0	4	2	1	4	4	4	1	1	0	0	48	3	38	11	27
3	1	1	46	98	1.73	32.7442	2	4	3	24	18	18	60	18	12	30	3	3	3	3	3	3	4	2	4	3	3	2	1	2	1	3	2	3	3	42	3	46	18	28
3	2	4	36	49	1.54	20.6612	2	4	1	19	16	14	49	5	5	10	2	3	2	4	2	3	3	3	3	2	1	2	1	3	1	2	2	4	2	35	3	38	16	22
3	1	2	52	59	1.63	22.2063	2	4	3	26	30	16	72	14	9	23	3	3	1	2	1	1	3	1	4	3	3	1	1	1	1	4	2	0	0	56	3	32	14	18
3	1	1	44	81	1.8	25	1	4	3	26	16	20	62	12	9	21	4	4	3	3	1	2	4	1	4	4	4	2	2	3	4	3	4	4	4	42	3	56	26	30
3	2	4	84	48	1.53	20.5049	2	4	4	14	4	16	34	10	12	22	3	4	2	4	3	4	4	2	4	4	4	0	1	1	0	4	4	0	0	28	3	42	17	25
3	2	4	48	71	1.6	27.7344	2	4	2	16	16	12	44	12	7	19	3	3	2	3	1	1	3	2	0	3	2	4	1	3	3	4	3	4	3	32	3	43	22	21
3	1	1	43	73	1.81	22.2826	2	4	1	12	16	10	38	16	10	26	1	2	1	3	3	3	2	3	4	3	3	3	2	2	3	2	2	3	3	28	3	42	14	28
3	2	4	74	71	1.62	27.0538	2	3	4	10	12	16	38	8	6	14	4	4	4	4	4	4	4	4	4	3	4	0	3	1	4	4	4	1	1	26	3	53	25	28
3	2	4	72	60	1.56	24.6548	2	3	1	16	16	12	44	16	10	26	1	3	1	4	4	2	4	2	4	3	3	2	3	3	4	3	3	3	4	32	3	50	18	32
3	1	1	82	62	1.6	24.2187	2	2	4	28	22	20	70	3	10	13	1	1	3	4	3	4	1	3	4	4	3	4	1	1	3	1	1	4	4	50	3	43	14	29
3	2	1	86	59	1.68	20.9042	1	4	4	24	24	10	58	13	11	24	4	2	1	4	3	4	3	3	4	0	3	0	1	2	4	3	2	2	4	48	3	42	18	24
3	1	1	71	70	1.65	25.7117	2	2	1	14	10	14	38	10	9	19	3	2	4	4	3	4	2	4	0	3	4	4	1	3	4	4	4	4	4	34	3	53	25	28
3	2	4	54	51	1.65	18.7328	2	3	4	20	4	14	38	3	5	8	4	4	3	0	0	4	4	1	0	1	2	4	0	3	4	4	4	4	3	26	3	48	27	21
3	1	2	46	92	1.76	29.7004	1	4	1	16	12	6	34	9	8	17	2	3	1	3	1	1	3	1	1	1	1	1	1	3	3	1	1	1	1	28	3	26	12	14
3	1	1	25	60	1.67	21.5139	1	4	1	22	16	10	48	13	9	22	2	3	3	3	3	2	3	2	0	2	4	1	2	1	3	3	2	2	3	38	3	39	18	21
3	1	3	78	54	1.56	22.1893	2	1	1	22	16	18	56	7	9	16	3	4	3	4	4	3	4	3	0	2	4	0	2	1	3	3	3	3	3	38	3	45	22	23
3	2	4	74	71	1.62	27.0538	2	3	4	10	12	16	38	8	6	14	4	4	4	4	4	4	4	4	4	3	4	0	3	1	4	4	4	1	1	26	3	53	25	28
3	1	3	60	61	1.65	22.4059	2	4	3	34	28	26	88	5	3	8	1	1	1	3	1	1	1	1	1	1	1	1	1	1	1	1	1	4	1	62	3	20	10	10
3	1	1	42	75	1.67	26.8923	2	3	3	24	16	16	56	8	13	21	3	3	1	3	3	4	3	3	4	2	4	4	2	3	2	4	3	3	4	40	3	52	19	33
3	1	1	75	72	1.61	27.7767	2	2	4	32	32	26	90	11	7	18	3	1	1	4	3	4	4	2	1	4	4	4	4	2	4	4	4	4	4	64	3	55	21	34
3	1	1	77	80	1.7	27.6817	2	3	4	18	10	28	56	11	7	18	1	4	1	4	1	4	4	0	2	4	4	4	3	4	3	1	1	4	3	28	3	48	15	33
3	1	1	74	50	1.53	21.3593	2	2	1	8	10	8	26	12	8	20	2	3	1	4	4	4	4	4	4	1	4	3	1	1	4	4	4	4	4	36	3	52	22	30
3	1	3	44	100	1.7	34.6021	1	3	3	24	14	22	60	12	11	23	1	1	2	3	1	1	3	3	4	2	3	2	1	3	2	3	2	2	2	38	3	35	13	22
3	2	4	40	73	1.63	27.4756	2	4	2	18	30	12	60	5	12	17	3	3	1	3	4	3	3	1	4	4	2	1	3	4	3	3	3	2	2	48	3	48	18	30
3	1	1	68	53	1.55	22.0604	2	3	4	18	14	16	48	8	6	14	4	4	4	4	4	4	4	4	4	4	4	4	4	4	4	4	4	4	4	32	3	68	28	40
